# Supplementary material
Source: PubMed Central journal article supplement (PMC4833607)
Supplement: NIHMS762628-supplement-1.pdf [file NIHMS762628-supplement-1.pdf]

**ASSOCIATION OF CIRCULATING RENIN AND ALDOSTERONE WITH  
OSTEOCALCIN AND BONE MINERAL DENSITY IN AFRICAN ANCESTRY  
FAMILIES**

Allison L Kuipers, PhD<sup>1</sup>, Candace M Kammerer, PhD<sup>2</sup>, J Howard Pratt, MD<sup>3</sup>, Clareann H Bunker, PhD<sup>1</sup>, Victor W Wheeler, MBBS, MRCOG<sup>4</sup>, Alan L Patrick, FRCP<sup>4</sup>, Joseph M Zmuda, PhD<sup>1,2</sup>

<sup>1</sup>Department of Epidemiology, University of Pittsburgh, Pittsburgh, PA, USA

<sup>2</sup>Department of Human Genetics, University of Pittsburgh, Pittsburgh, PA, USA

<sup>3</sup>Department of Medicine, Indiana University School of Medicine, Indianapolis, IN, USA.

<sup>4</sup>Tobago Health Studies Office, Scarborough, Tobago, Trinidad and Tobago

**Running Title:** Renin and Bone Mineral Density

**Manuscript Counts:** Abstract: 249; All text: 4834; Tables: 4; Supplemental Tables: 2; Refs: 30

**Corresponding Author:**

Allison L. Kuipers, PhD; Department of Epidemiology,  
Graduate School of Public Health, University of Pittsburgh;  
130 DeSoto Street, A543 Crabtree Hall, Pittsburgh, PA 15261;  
kuipers@pitt.edu; Phone: 412-624-2781; Fax: 412-624-7397

**Table S1. Multivariable\* Association of Plasma Aldosterone Concentration and Aldosterone to Renin Ratio with Osteocalcin and Bone Mineral Density in African Ancestry Families**

| Bone Measure                        | Difference (%) in                         |         | Difference (%) in                         |                   |
|-------------------------------------|-------------------------------------------|---------|-------------------------------------------|-------------------|
|                                     | bone measure per<br>1 SD PAC <sup>†</sup> | P-value | bone measure per<br>1 SD ARR <sup>‡</sup> | P-value           |
| Total OC (ug/l)                     | 0.23                                      | 0.881   | <b>8.69</b>                               | <b>&lt;0.0001</b> |
| Whole Body BMD (g/cm <sup>2</sup> ) | -0.62                                     | 0.185   | -0.80                                     | 0.121             |
| Total Hip BMD (g/cm <sup>2</sup> )  | -0.22                                     | 0.730   | -1.26                                     | 0.072             |
| Cortical BMD (g/cm <sup>3</sup> )   | 0.02                                      | 0.896   | 0.07                                      | 0.577             |
| Trabecular BMD (g/cm <sup>3</sup> ) | 0.07                                      | 0.907   | <b>-1.69</b>                              | <b>0.014</b>      |

\*Multivariable model includes adjustment for age, sex, height, weight, menopausal status, systolic blood pressure, diastolic blood pressure, hypertensive medication, eGFR, diabetes, current smoking, drinking, walking and calcium supplementation.

<sup>†</sup>Values shown are the percent difference in bone measure per 1 SD (8.1 ng/dL) greater plasma aldosterone concentration.

<sup>‡</sup>Values shown are the percent difference in bone measure per 1 SD (17.9 ng/dL per ng/mL/h) greater aldosterone to renin ratio.

**Table S2. Multivariable\* Adjusted Genetic Correlations of Aldosterone to Renin Ratio with Osteocalcin and Bone Mineral Density**

| Bone Measure                        | Heritability       | Aldosterone to Renin Ratio ( $H^2_r \pm SE = 0.705 \pm 0.10$ ) |                  |
|-------------------------------------|--------------------|----------------------------------------------------------------|------------------|
|                                     | ( $H^2_r \pm SE$ ) | $\rho_G$                                                       | $\rho_G$ P-value |
| Total OC (ug/l)                     | 0.727 $\pm$ 0.11   | <b>0.323</b>                                                   | <b>0.022</b>     |
| Whole Body BMD (g/cm <sup>2</sup> ) | 0.623 $\pm$ 0.12   | 0.175                                                          | 0.288            |
| Total Hip BMD (g/cm <sup>2</sup> )  | 0.696 $\pm$ 0.10   | -0.052                                                         | 0.717            |
| Cortical BMD (g/cm <sup>3</sup> )   | 0.444 $\pm$ 0.12   | 0.199                                                          | 0.243            |
| Trabecular BMD (g/cm <sup>3</sup> ) | 0.622 $\pm$ 0.11   | 0.118                                                          | 0.455            |

\*Multivariable models include adjustment for age, sex, height, weight, menopausal status, systolic blood pressure, diastolic blood pressure, hypertensive medication, eGFR, diabetes, current smoking, drinking, walking and calcium supplementation.

$H^2_r$ : residual genetic heritability estimate after adjustment;  $\rho_G$  estimated genetic bivariate correlation.
